# Supplementary material for: The Effects of Ocean Surface Waves on Global Forecast in CFS Modeling System v2.0
Source: Copernicus journal article supplement (doi:10.5194/gmd-2020-327), 2020-10-29
Supplement: Supplementary file 1 [file gmd-2020-327-supplement.pdf]

Supplementary material for

**The Effects of Ocean Surface Waves on Global Forecast in CFS Modeling System v2.0**

Ruizi Shi<sup>1</sup>, Fanghua Xu<sup>1</sup>, Li Liu<sup>1</sup>, Zheng Fan<sup>1</sup>, Hao Yu<sup>1</sup>, Xiang Li<sup>2</sup> and Yunfei Zhang<sup>2</sup>

<sup>1</sup>Ministry of Education Key Laboratory for Earth System Modeling, and Department of Earth System Science, Tsinghua University, Beijing 100084, China

<sup>2</sup> Key Laboratory of Marine Hazards Forecasting, National Marine Environmental Forecasting Center, Ministry of Natural Resources, Beijing, 100081, China

*Correspondence to:* Fanghua Xu ([fxu@mail.tsinghua.edu.cn](mailto:fxu@mail.tsinghua.edu.cn))

**Contents of this file**

Figures S1 to S12  
Tables S1

**Introduction**

Figures S1 to S12 show the distribution maps of daily average SST (Fig.S1, S2, S7&S8), SWH (Fig.S3, S4, S9&S10), WSP10 (Fig.S5, S6, S11&S12) in CTRL, their bias and percentage absolute difference of the bias from experiments versus the CTRL, on January 10, 2017, August 10, 2018, January 5, 2019 and July 5, 2018, respectively. All of these simulated data are from the simulations described in the main text, of which the periods span from January 3 to 10, 2017, from August 3 to 10, 2018, from January 1 to 8, 2019 and from July 1 to 8, 2018, respectively. Other settings and processing steps are the same as those in the main text.

Tables S1 shows the correlation coefficient, RMSE and skill score of SWH simulations versus Jason-3 observation at 00:00 on Jan 3, 2017. These simulated data are generated by the single WW3 model (without coupling) with different input-dissipation source terms (ST) and wind forces (CCMP and ERA5).

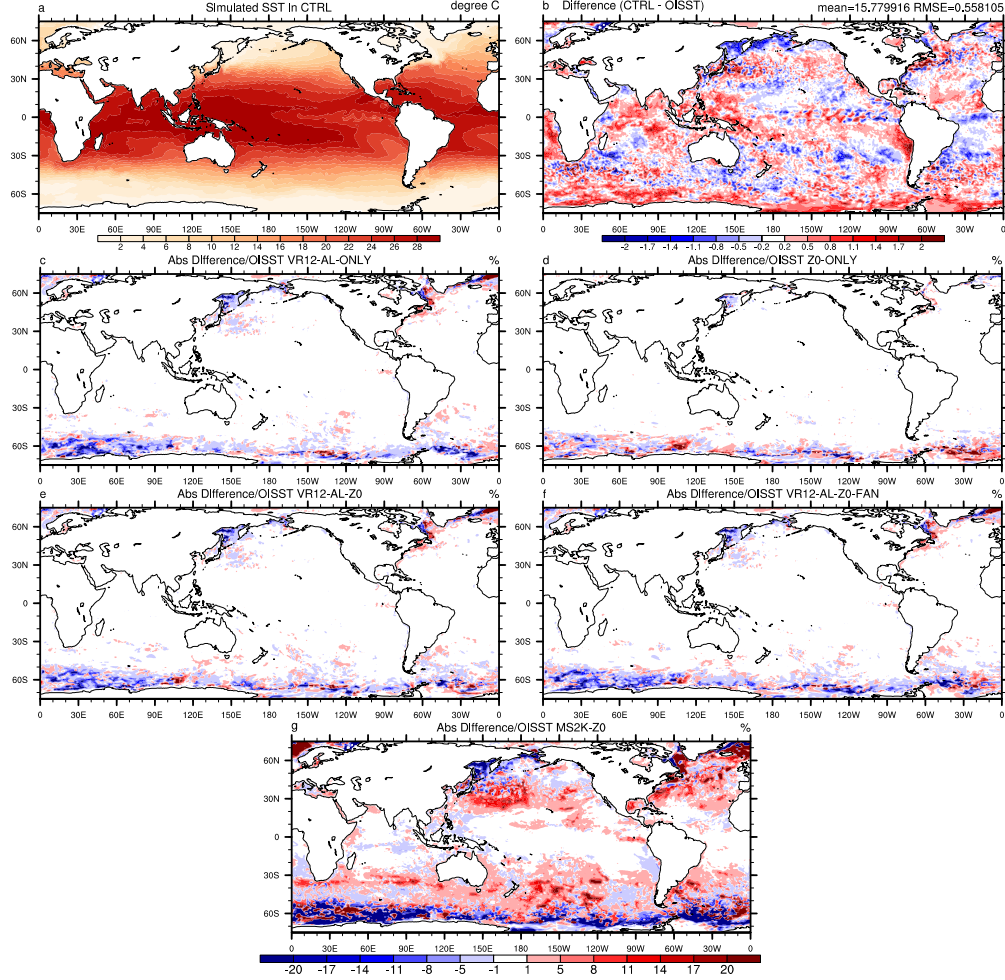

**Figure S1.** The daily average SST (°C) in CTRL, its bias in CTRL and percentage absolute difference of bias on January 10, 2017: a the SST in CTRL, b the SST bias between CTRL and OISST (CTRL minus OISST), c/d/e/f/g the percentage absolute difference between VR12-AL-ONLY/Z0-ONLY/VR12-AL-Z0/VR12-AL-Z0-FAN/MS2K-Z0 and CTRL. The absolute difference is a percentage computed as  $\text{PAD} = \frac{|\hat{y}_s - y| - |\hat{y}_c - y|}{|y|} \times 100\%$ , where  $y$  is OISST,  $\hat{y}_c$  is simulated SST in CTRL and  $\hat{y}_s$  is simulated SST in other experiments, so a negative value means that the error is smaller than that of CTRL, and vice versa.

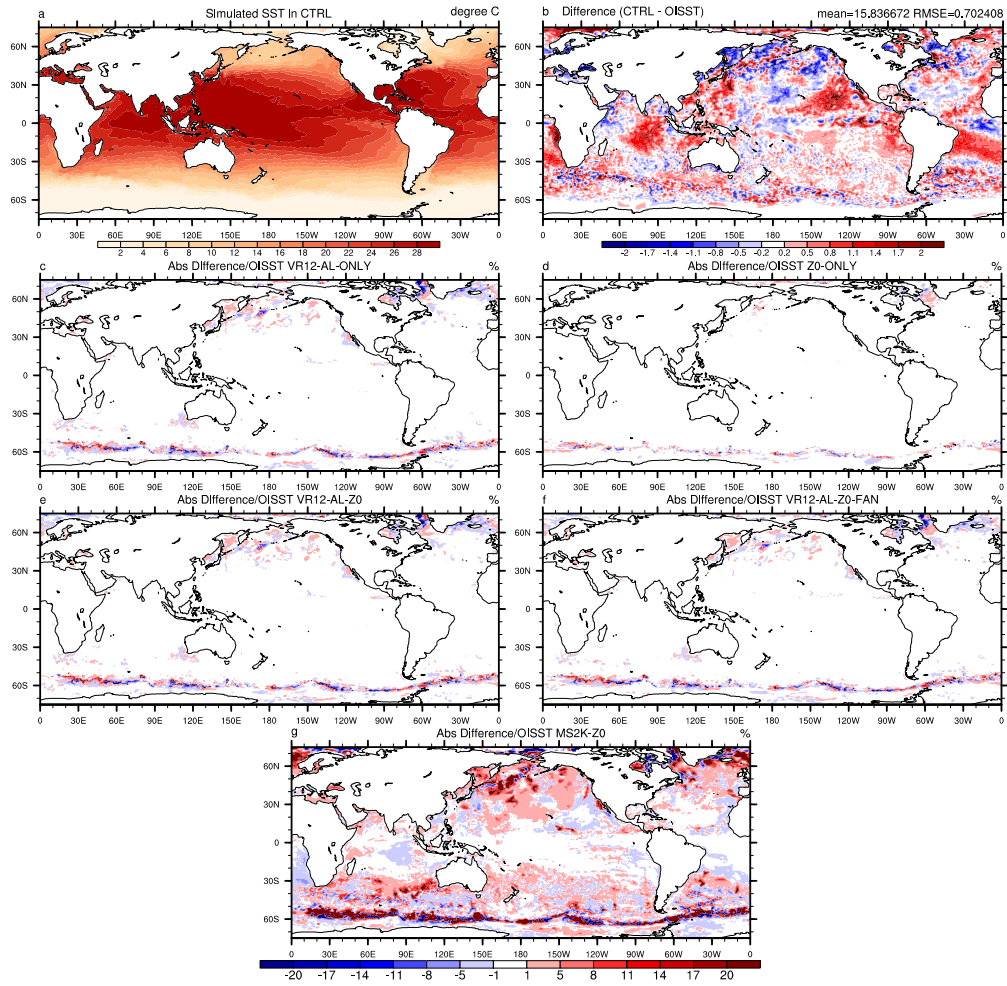

**Figure S2.** As Fig. S1, but for the daily average SST (°C) in CTRL, its bias in CTRL and absolute difference of bias on August 10, 2018.

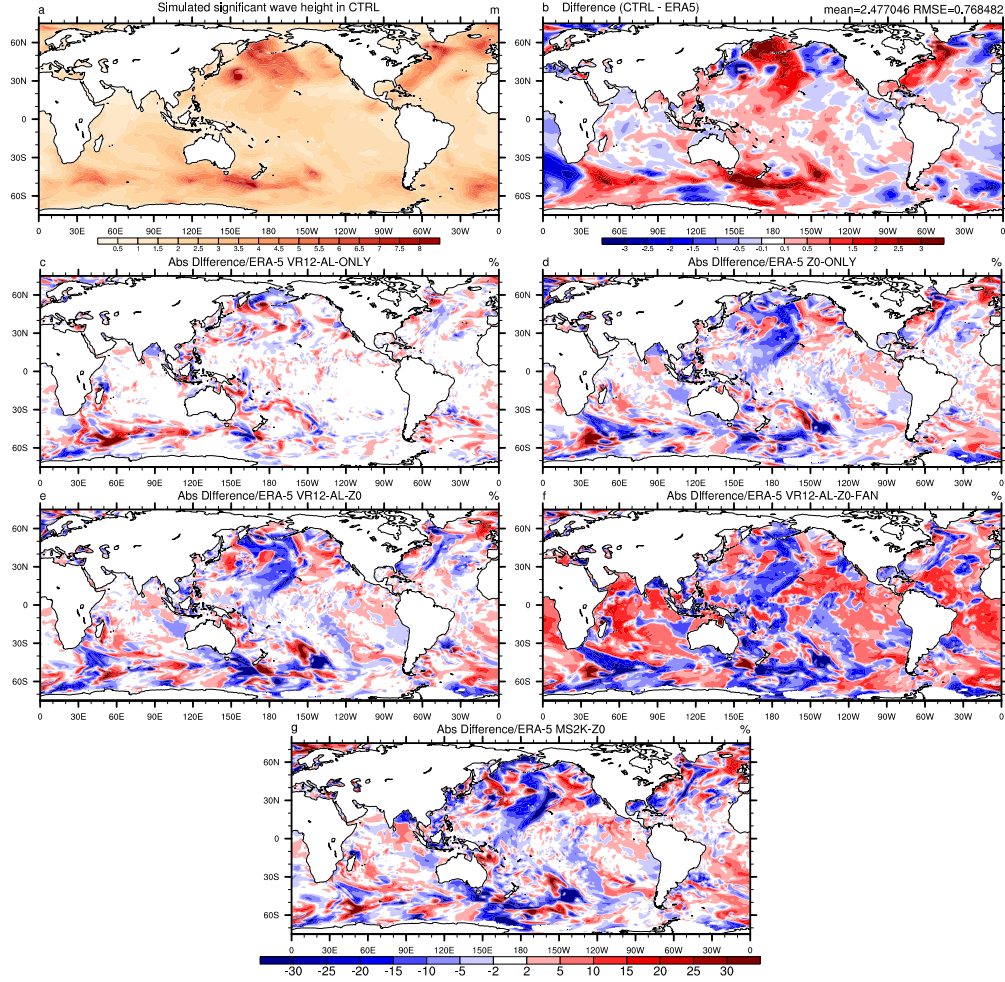

**Figure S3.** The SWH (m) in CTRL, its bias in CTRL and percentage absolute difference of bias on January 10, 2017: a the SWH in CTRL, b the SWH bias between CTRL and ERA5 (CTRL minus ERA5), c/d/e/f/g the percentage absolute difference between VR12-AL-ONLY/Z0-ONLY/VR12-AL-Z0/VR12-AL-Z0-FAN/MS2K-Z0 and CTRL. The absolute difference is a percentage computed as  $PAD = \frac{|\hat{y}_s - y| - |\hat{y}_c - y|}{|\hat{y}_c - y|} \times 100\%$ , where  $y$  is the SWH from ERA5,  $\hat{y}_c$  is simulated SWH in CTRL and  $\hat{y}_s$  is simulated SWH in other experiments, so a negative value means that the error is smaller than that of CTRL, and vice versa.

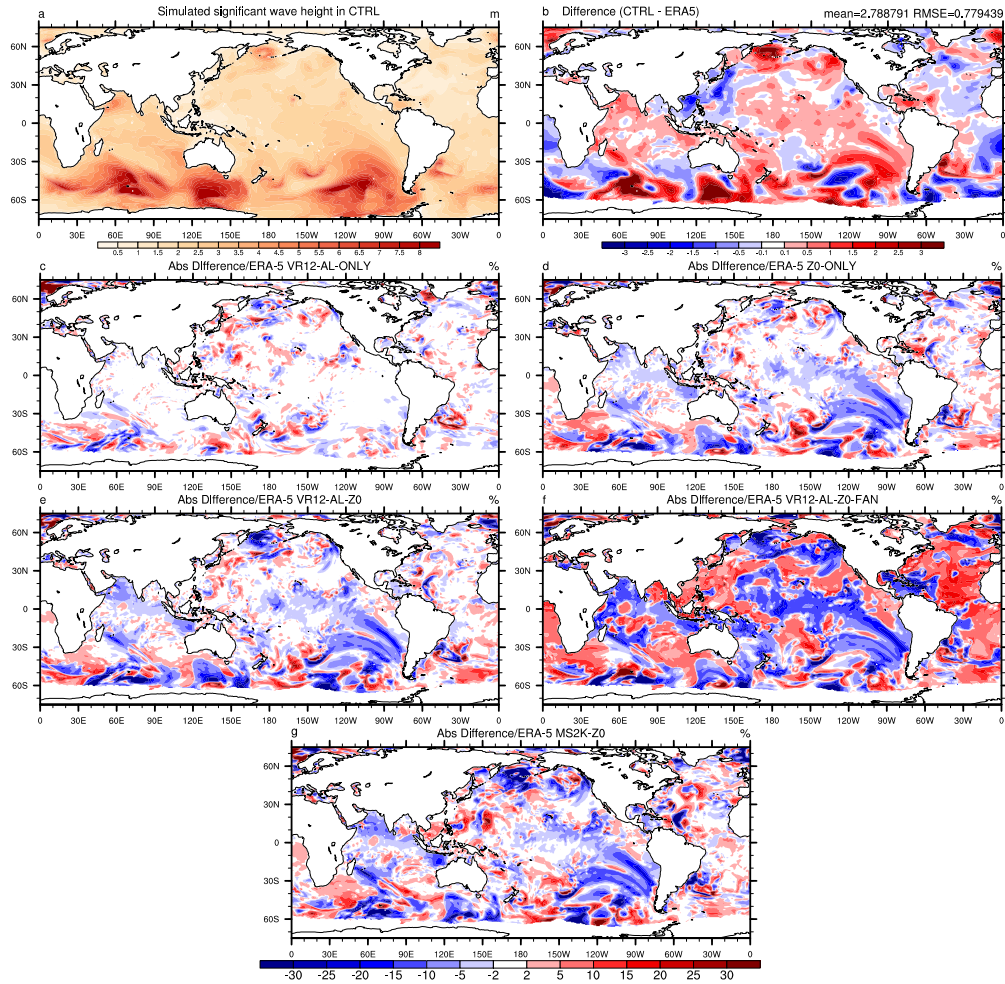

**Figure S4.** As Fig. S3, but for the SWH (m) in CTRL, its bias in CTRL and absolute difference of bias on August 10, 2018.

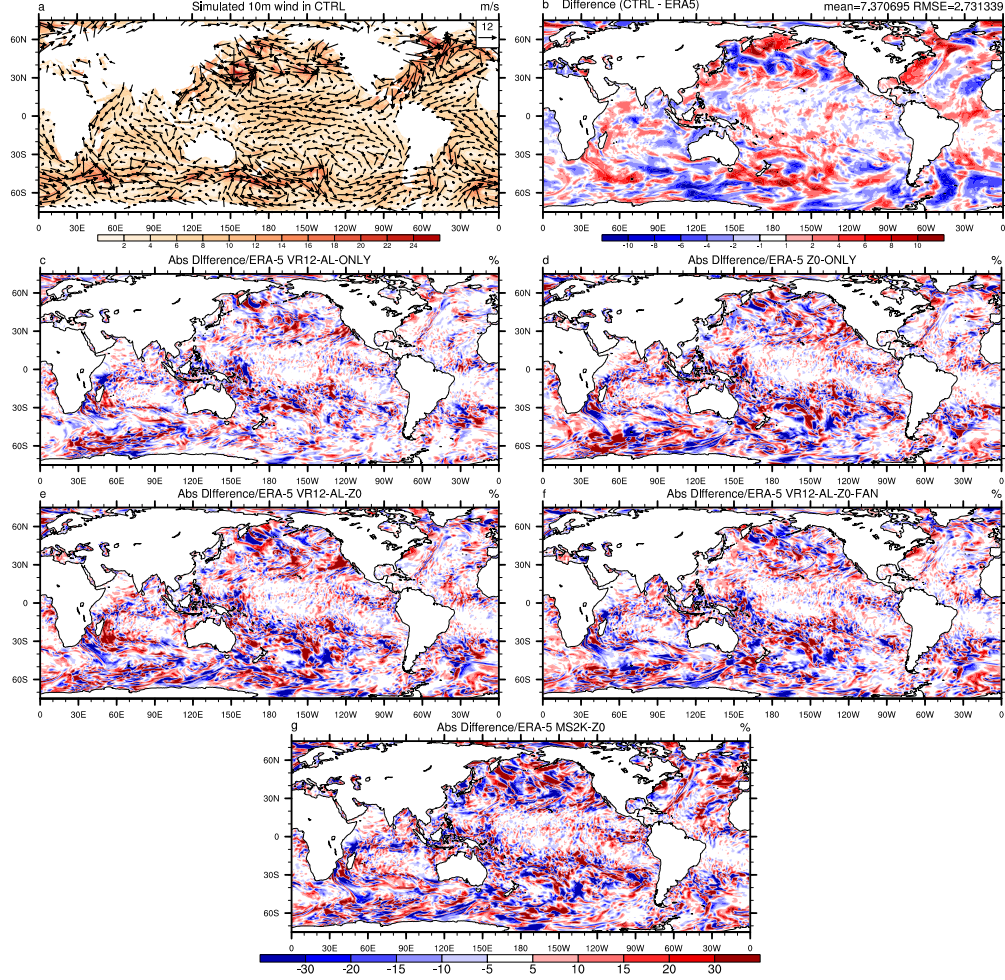

**Figure S5.** The WSP10 (m/s) in CTRL, its bias in CTRL and percentage absolute difference of bias on January 10, 2017: a the 10-m wind in CTRL, b the 10-m wind bias between CTRL and ERA5 (CTRL minus ERA5), c/d/e/f/g the percentage absolute difference between VR12-AL-ONLY/Z0-ONLY/VR12-AL-Z0/VR12-AL-Z0-FAN/MS2K-Z0 and CTRL. The absolute difference is a percentage computed as  $PAD = \frac{|\hat{y}_s - y| - |\hat{y}_c - y|}{|y|} \times 100\%$ , where  $y$  is WSP10 from ERA5,  $\hat{y}_c$  is simulated WSP10 in CTRL and  $\hat{y}_s$  is simulated WSP10 in other experiments, so a negative value means that the error is smaller than that of CTRL, and vice versa.

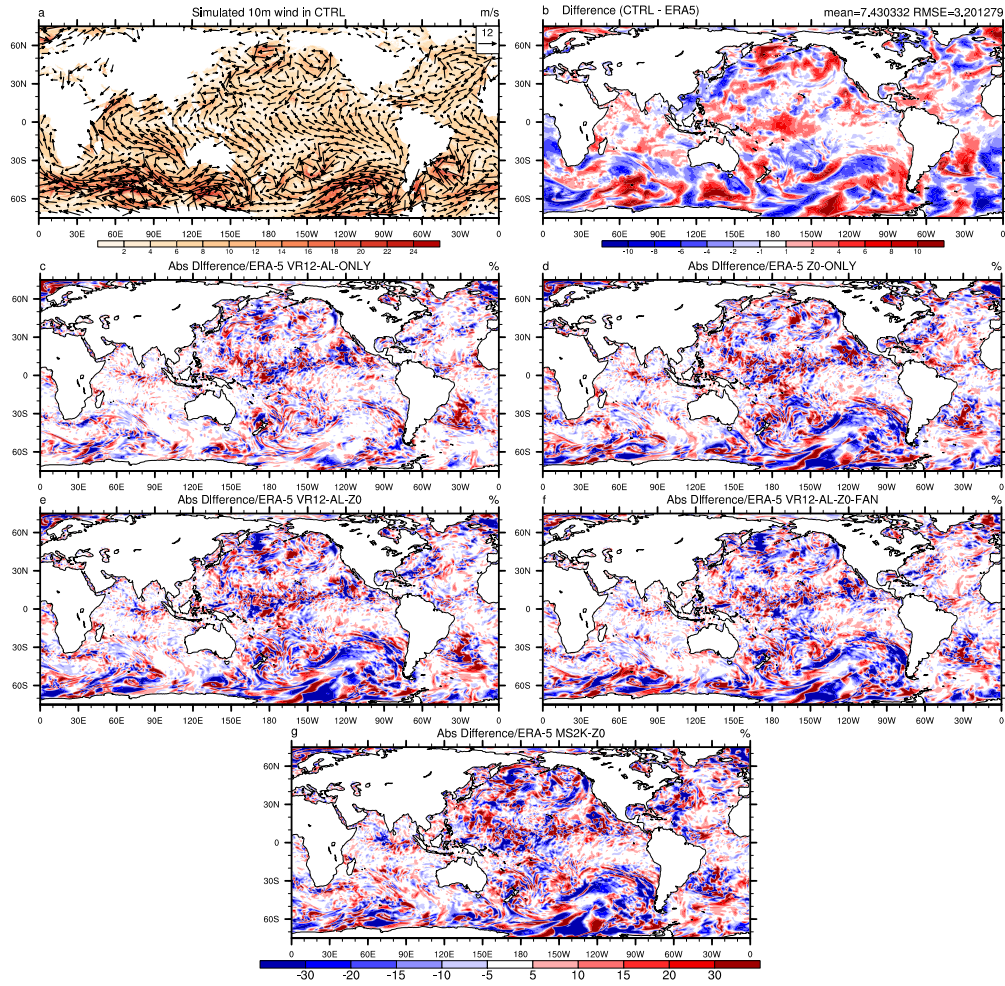

**Figure S6.** As Fig. S5, but for the WSP10 (m/s) in CTRL, its bias in CTRL and absolute difference of bias on August 10, 2018.

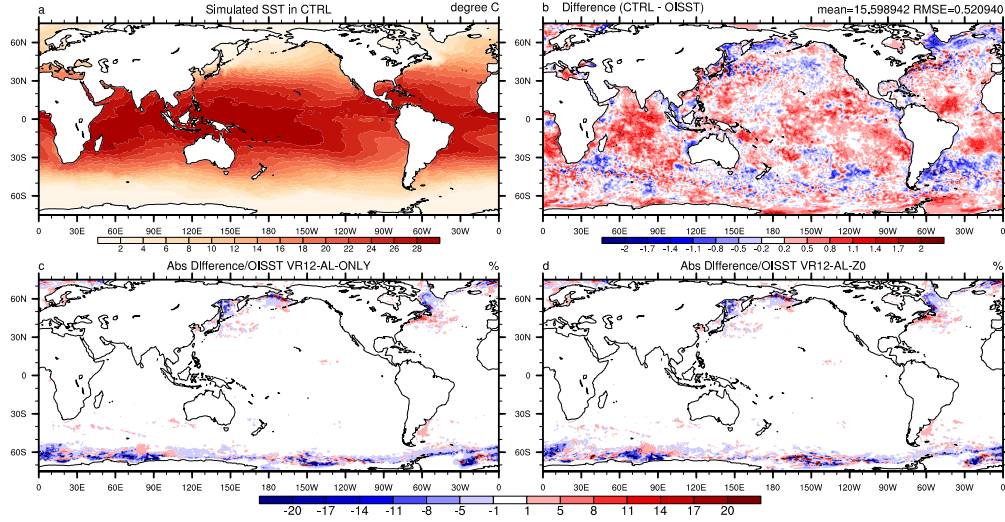

**Figure S7.** The daily average SST (°C) in CTRL, its bias in CTRL and percentage absolute difference of bias on January 5, 2019: a the SST in CTRL, b the SST bias between CTRL and OISST (CTRL minus OISST), c/d the percentage absolute difference between VR12-AL-ONLY/VR12-AL-Z0 and CTRL. The absolute difference is a percentage computed as  $PAD = \frac{|\hat{y}_s - y| - |\hat{y}_c - y|}{|y|} \times 100\%$ , where  $y$  is OISST,  $\hat{y}_c$  is simulated SST in CTRL and  $\hat{y}_s$  is simulated SST in other experiments, so a negative value means that the error is smaller than that of CTRL, and vice versa.

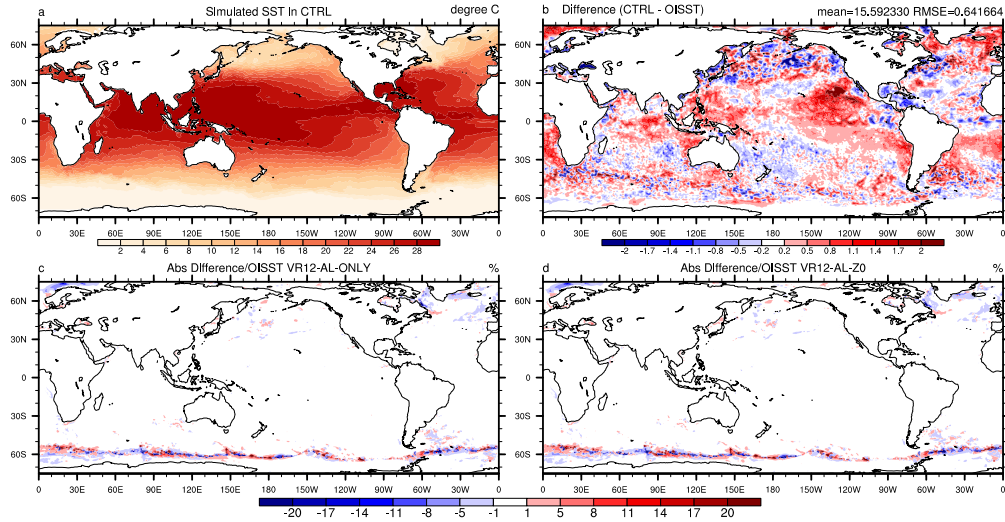

**Figure S8.** As Fig. S7, but for the daily average SST (°C) in CTRL, its bias in CTRL and absolute difference of bias on July 5, 2018.

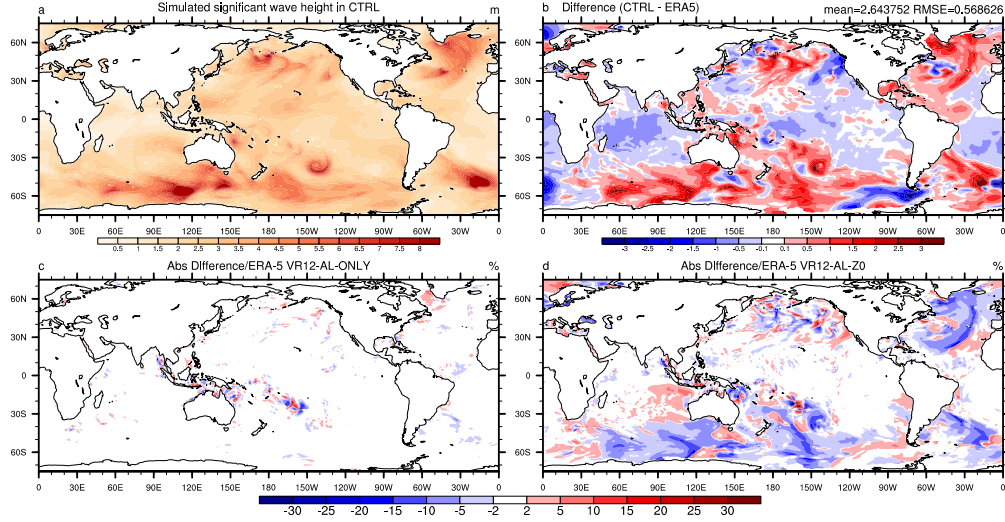

**Figure S9.** The SWH (m) in CTRL, its bias in CTRL and percentage absolute difference of bias on January 5, 2019: a the SWH in CTRL, b the SWH bias between CTRL and ERA5 (CTRL minus ERA5), c/d the percentage absolute difference between VR12-AL-ONLY/VR12-AL-Z0 and CTRL. The absolute difference is a percentage computed as  $PAD = \frac{|\hat{y}_s - y| - |\hat{y}_c - y|}{|y|} \times 100\%$ , where  $y$  is the SWH from ERA5,  $\hat{y}_c$  is simulated SWH in CTRL and  $\hat{y}_s$  is simulated SWH in other experiments, so a negative value means that the error is smaller than that of CTRL, and vice versa.

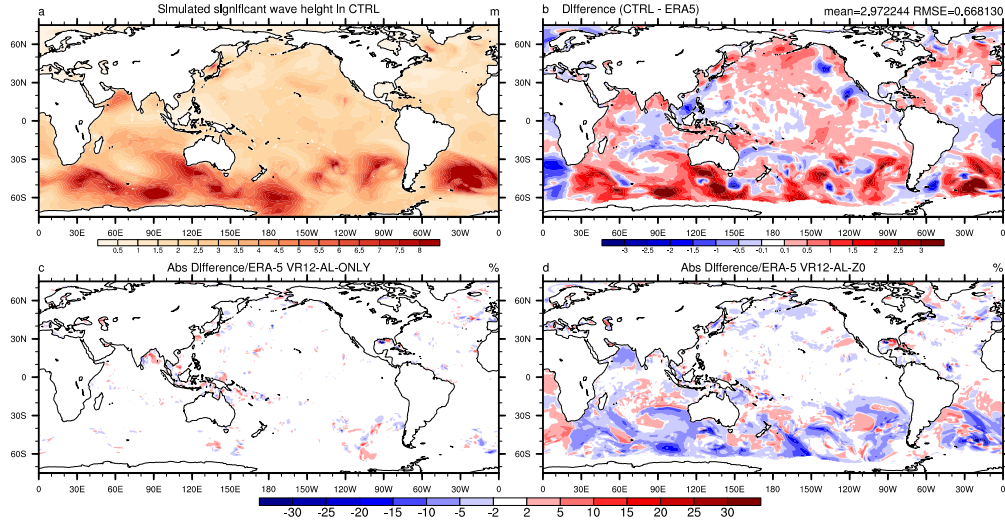

**Figure S10.** As Fig. S9, but for the SWH (m) in CTRL, its bias in CTRL and absolute difference of bias on July 5, 2018.

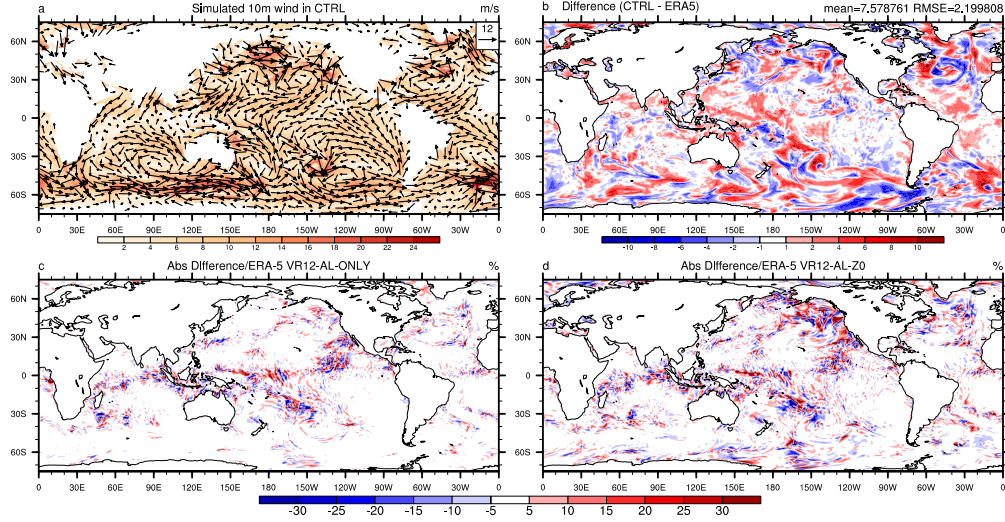

**Figure S11.** The WSP10 (m/s) in CTRL, its bias in CTRL and percentage absolute difference of bias on January 5, 2019: a the 10-m wind in CTRL, b the 10-m wind bias between CTRL and ERA5 (CTRL minus ERA5), c/d the percentage absolute difference between VR12-AL-ONLY/VR12-AL-Z0 and CTRL. The absolute difference is a percentage computed as  $PAD = \frac{|\hat{y}_s - y| - |\hat{y}_c - y|}{|y|} \times 100\%$ , where  $y$  is WSP10 from ERA5,  $\hat{y}_c$  is simulated WSP10 in CTRL and  $\hat{y}_s$  is simulated WSP10 in other experiments, so a negative value means that the error is smaller than that of CTRL, and vice versa.

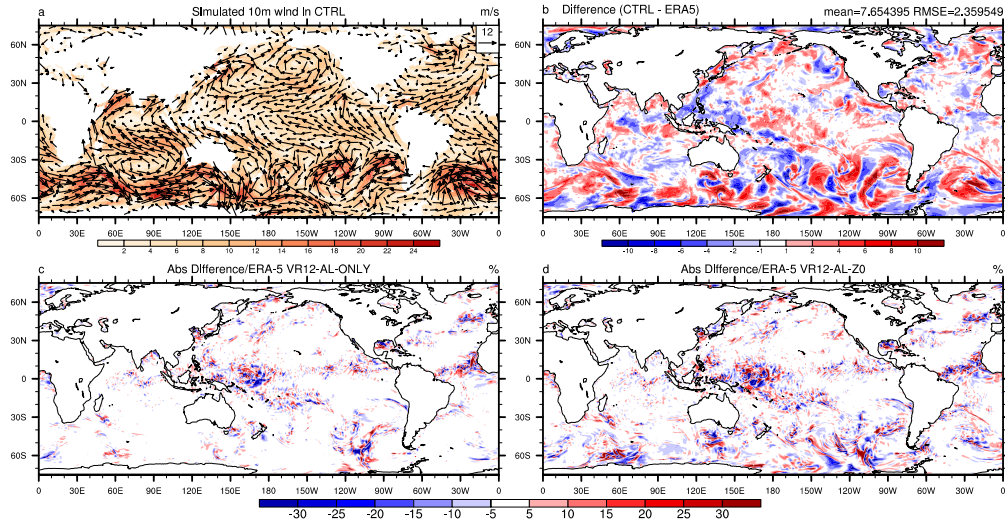

**Figure S12.** As Fig. S11, but for the WSP10 (m/s) in CTRL, its bias in CTRL and absolute difference of bias on July 5, 2018.

**Table S1.** Correlation coefficient, RMSE and skill score of SWH in WW3 simulations versus Jason-3 observation at 00:00 on Jan 3, 2017. The RMSE and skill score (SS) are calculated as

$RMSE = \sqrt{\sum_{i=1}^n (\hat{y}_i - y_i)^2 / n}$  and  $SS = 1 - \frac{\sum_{i=1}^n (\hat{y}_i - y_i)^2}{\sum_{i=1}^n (|\hat{y}_i - \bar{y}| + |y_i - \bar{y}|)^2}$ , respectively, where  $\hat{y}_i$  is simulated value,  $y_i$  is Jason-3 data and  $\bar{y}$  is the average,  $i=1, n$  and  $n$  is the total number of measurements in the Jason-3 orbit.

| Experiments | Correlation<br>Coefficient<br>( $P < 0.01$ ) | RMSE | Skill<br>Score |
|-------------|----------------------------------------------|------|----------------|
| ERA-5 ST2   | 0.76                                         | 0.42 | 0.85           |
| ERA-5 ST3   | 0.77                                         | 0.41 | 0.86           |
| ERA-5 ST4   | 0.82                                         | 0.37 | 0.89           |
| ERA-5 ST6   | 0.82                                         | 0.49 | 0.86           |
| CCMP ST4    | 0.69                                         | 0.54 | 0.78           |
| CCMP ST2    | 0.68                                         | 0.59 | 0.76           |
